# Supplementary material
Source: HighWire-hosted journal article supplement (https://cmaj.ca/content/suppl/2013/09/16/cmaj.130451)
Supplement: cognitive-straus-2-at.pdf [file cognitive-straus-2-at.pdf]

## Appendix 2 (as supplied by the authors): McHarm assessment

| Questions from McHarm tool                                                                                 | Winblad et al. <sup>27</sup> | Salloway et al. <sup>29</sup> | Petersen et al. <sup>30</sup> | Doody et al. <sup>31</sup> | Feldman et al. <sup>32</sup> | Ferris et al. <sup>33</sup> |
|------------------------------------------------------------------------------------------------------------|------------------------------|-------------------------------|-------------------------------|----------------------------|------------------------------|-----------------------------|
| 1. Were harms PRE-DEFINED?                                                                                 | N                            | N                             | N                             | Y                          | Y                            | N                           |
| 2. Were SERIOUS events defined?                                                                            | N                            | N                             | N                             | Y                          | N                            | N                           |
| 3. Was the number of DEATHS in each study specified?                                                       | Y                            | Y                             | Y                             | Y                          | Y                            | N                           |
| 4. Was the mode of harm collection specified as ACTIVE?                                                    | U                            | U                             | U                             | Y                          | Y                            | N                           |
| 5. Was the mode of harms collected as PASSIVE?                                                             | U                            | U                             | U                             | U                          | U                            | Y                           |
| 6. Did the study specify WHO collected the harms?                                                          | N                            | N                             | N                             | Y                          | N                            | N                           |
| 7. Did the study specify TRAINING of BACKGROUND of who ascertained the harms?                              | N                            | N                             | N                             | N                          | N                            | N                           |
| 8. Did the study specify the TIMING and FREQUENCY of collection of harms?                                  | N                            | N                             | N                             | Y                          | Y                            | N                           |
| 9. Did the authors use STANDARD scales or checklists for harms?                                            | N                            | N                             | N                             | Y                          | U                            | N                           |
| 10. Did the authors specify if the harms reported encompass ALL the events collected or a selected sample? | Y                            | Y                             | N                             | U                          | Y                            | Y                           |
| 11. Was the NUMBER of participants that withdrew or were lost to follow up specified for each study group? | Y                            | Y                             | Y                             | Y                          | Y                            | N                           |
| 12. Was the TOTAL NUMBER of participants affected by harms specified for each study arm?                   | U                            | Y                             | Y                             | Y                          | Y                            | Y                           |
| 13. Did the author(s) specify the NUMBER for each TYPE of harmful event for each study group?              | U                            | Y                             | Y                             | Y                          | Y                            | Y                           |
| 14. Did the author(s) specify the type of analyses undertaken for harms data?                              | Y                            | U                             | N                             | N                          | N                            | N                           |

Note: N = no, U = unclear, Y = yes.

\*Combines harms for the 2 studies reported in this publication.
